# Supplementary material for: Ordered mesoporous TiC–C composites as cathode materials for Li–O2 batteries
Source: Royal Society of Chemistry journal article supplement (doi:10.1039/c5cc09034b), 2016-01-01
Supplement: c5cc09034b1.pdf [file c5cc09034b1.pdf]

Supplementary Information:

## **Ordered mesoporous TiC-C composites as cathode material for Li-O<sub>2</sub> batteries**

Feilong Qiu,<sup>a</sup> Ping He,<sup>\*a</sup> Jie Jiang,<sup>a</sup> Xueping Zhang,<sup>a</sup> Shengfu Tong,<sup>a</sup> Haoshen Zhou.<sup>\*ab</sup>

<sup>a</sup> Center of Energy Storage Materials & Technology, College of Engineering, National Laboratory of Solid State Microstructures, and Applied Sciences and Collaborative Innovation Center of Advanced Microstructures Nanjing University, Nanjing, 210093, China.  
E-mail: pinghe@nju.edu.cn and hszhou@nju.edu.cn

<sup>b</sup> Energy Technology Research Institute, National Institute of Advanced Industrial Science and Technology (AIST), Umezono 1-1-1, Tsukuba, 305-8568, Japan

### **Experimental details:**

#### **Preparation of ordered mesoporous TiC-C composites (OMTC)**

OMTC was prepared according to procedures previously reported with some difference.<sup>1,2</sup>

*Synthesis of resol precursors:* 8 g of phenol was melted under 70°C, then 2 g of NaOH aqueous solution (20 Wt %) and 14.5 g of formaldehyde solution (37 wt %) were added successively with continued stirring. The mixture was kept at 70°C for 2 h and then cooled to room temperature naturally. The solution was adjusted to pH=7 with HCl solution before it was dried at 40°C under vacuum for 48 h to remove water. Next, the products were diluted by ethanol and then filtrated to remove the NaCl.

*Synthesis of tetrabutyl titanium-citrate compounds:* 22 g of tetrabutyl titanate was dissolved in 30 ml ethanol and 13.6 g of citric acid was dissolved in 15 ml ethanol,

and these solutions were mixed subsequently. The mixture was heated to 60°C to form gel and then dissolved in the ethanol/water mixture (1:1, v/v) to obtain a 1 mol kg<sup>-1</sup> tetrabutyl titanium-citrate solution.

*Synthesis of OMTC:* 2.7 g of F127, 2.4 g of resol precursor (phenol 45.4 wt %), 3.4 g of tetrabutyl titanium-citrate solution and 20 ml of ethanol/water mixture (1:1, v/v) were mixed with continued stirring to form a transparent solution. The solution was transferred to petri dishes and maintained at 35°C for 24 h, and then heated to 100°C for another 24 h. The product was calcinated under Ar atmosphere at 300°C for 3 h, 600°C for 2 h and 1300°C for 2 h in a tube furnace. The heating rate was 1°C min<sup>-1</sup> and the cooling rate was 2°C min<sup>-1</sup>. The obtained material was then balled into particles before they were used.

### **Characterization**

The scanning electron microscopy (SEM) images were collected on a Hitachi SU-8000. The transmission electron microscopy (TEM) and high resolution transmission electron microscopy (HR-TEM) results were obtained on a JEOL JEM-200CX. The X-ray photoelectron spectroscopy (XPS) results were received on a PHI 5000 VersaProbe. The X-ray diffraction (XRD) and small angle X-ray diffraction (SAXRD) patterns were got on a Bruker D8-Advaned diffractometer. The nitrogen adsorption-desorption analysis was carried out on an ASAP 2020 instrument. The content of the TiC was investigated by thermogravimetry (TG) on a SDT Q600. The gas contents during the charge process were determined by gas chromatography-mass spectrometer (GC-MS) on a Perkin-Elmer (Clarus 680 and SQ 8S).

### **Preparation of electrodes for Li-O<sub>2</sub> battery measurements.**

Electrode preparation and measurement: The OMTC electrode consisted of as-prepared OMTC 40 wt %, Super P 40 wt % and polyvinylidene fluoride (PVDF) binder 20 wt %. SP electrode: Super P 80 wt % and PVDF 20 wt %; n-TiC electrode: boughten TiC nanoparticle (Aladdin, 50nm) 40 wt %, Super P 40 wt % and PVDF 20 wt %. N-methyl-2-pyrrolidone (NMP) was added to the mixture, and the formed slurry was coated onto an Al current collector. The coated electrode was then dried under vacuum at 80 °C over night. The mass loading density of total for cycling tests was about 0.2 mg cm<sup>-2</sup>. All batteries were assembled in an Ar-filled glove box, using a lithium foil anode, a glass filter separator, the prepared electrode and electrolyte (a solution of LiCF<sub>3</sub>SO<sub>3</sub> in a TEDGME solvent with a molar ratio of 1:4). The electrochemical measurements were carried out under oxygen (about 1 atm) at room temperature on a LAND battery test system and the specific capacity was normalized based on the total amount of Super P and catalyst (OMTC or n-TiC).

### **Results:**

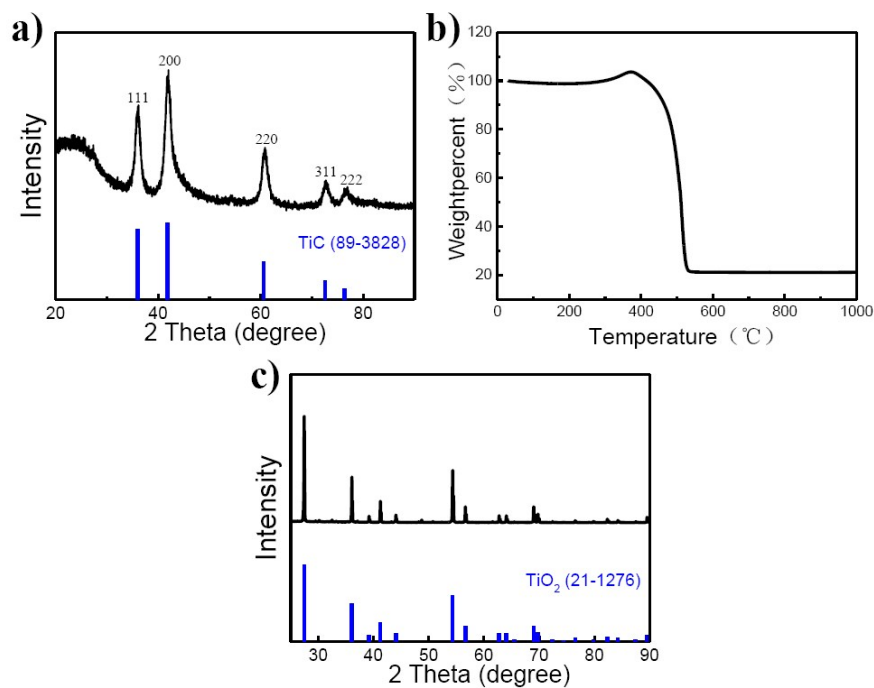

**Fig. S1** a) XRD pattern of OMTc. b) TG curve of OMTc. c) XRD pattern of the calcined OMTc.

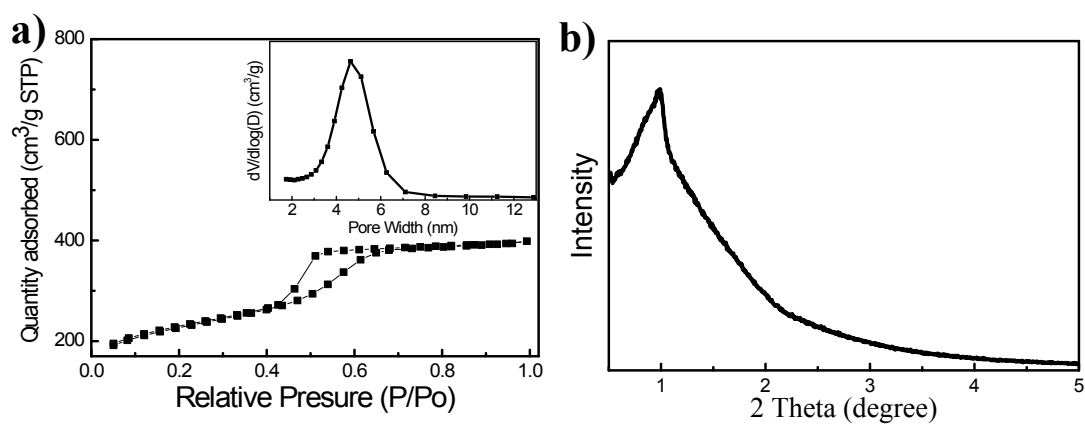

**Fig. S2** a) The nitrogen adsorption-desorption and pore size distribution (inset) curves of OMTc. b) SAXRD pattern of OMTc.

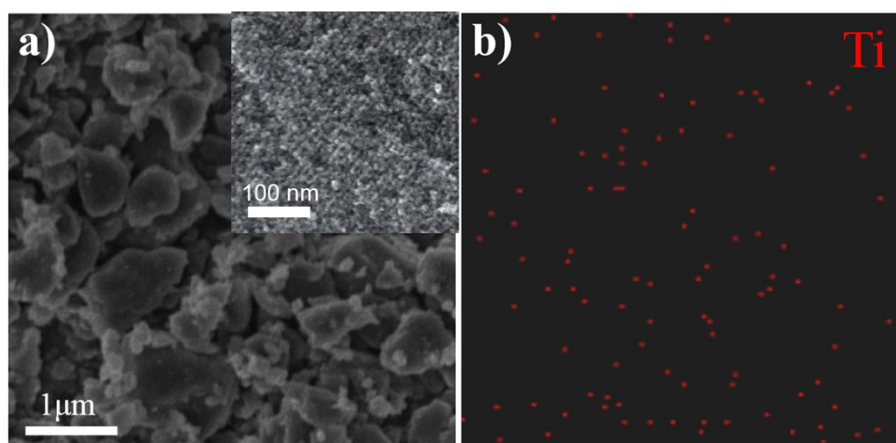

**Fig. S3** a) SEM images of the OMTC particles. b) EDS mapping of the OMTC particles.

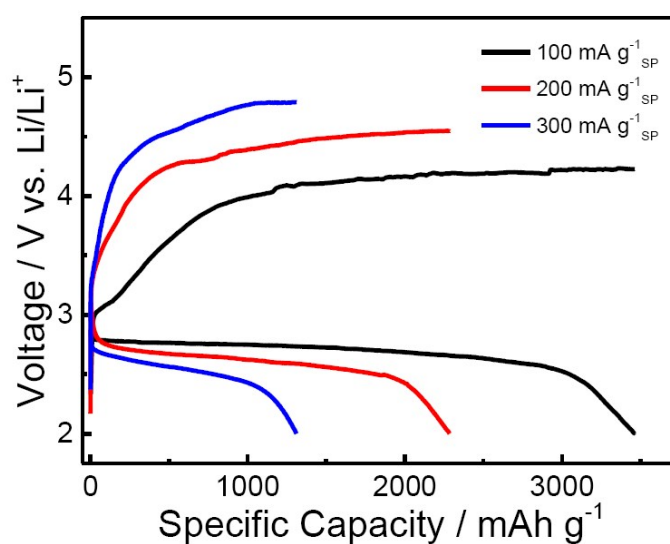

**Fig. S4** Discharge and charge curves of the OMTC electrode at different rates.

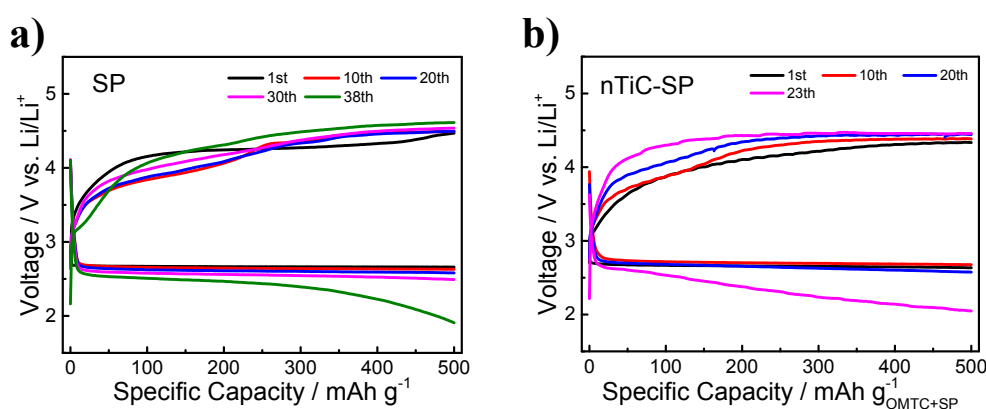

**Fig. S5** a, b) Cycle curves of SP and n-TiC electrodes with a fixed capacity of 500  $\text{mAh g}^{-1}$ , at a current density of  $100 \text{ mA g}^{-1}_{\text{SP}}$ .

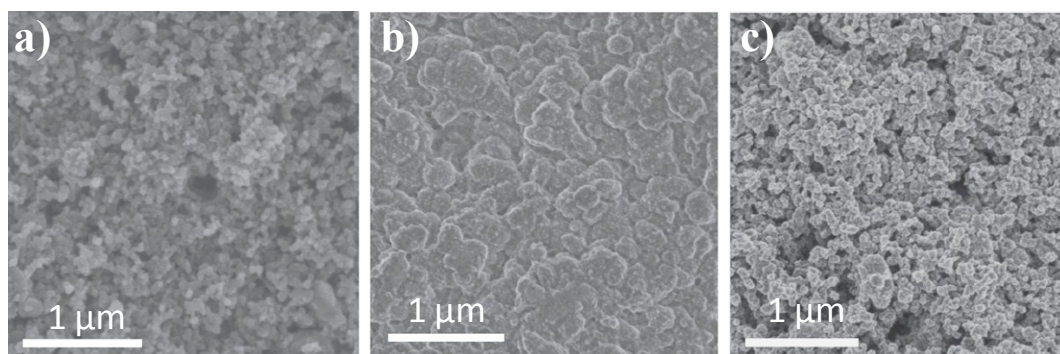

**Fig. S6** SEM images of the OMTC electrodes at various states: a) Pristine. b) Discharged. c) Recharged.

### Reference:

- 1 Y. Meng, D. Gu, F. Q. Zhang, Y. F. Shi, H. F. Yang, Z. Li, C. Z. Yu, B. Tu and D. Y. Zhao, *Angew Chem Int Edit*, 2005, **44**, 7053-7059.
- 2 T. Yu, Y. H. Deng, L. Wang, R. L. Liu, L. J. Zhang, B. Tu and D. Y. Zhao, *Advanced Materials*, 2007, **19**, 2301-2306.
